# Supplementary material for: Chromatin binding of RCC1 during mitosis is important for its nuclear localization in interphase
Source: PubMed Central journal article supplement — Mol Biol Cell. 2016 Jan 15;27(2):371–81. doi: 10.1091/mbc.E15-07-0497 (PMC4713138; doi:10.1091/mbc.e15-07-0497), 2016-01-15
Supplement: supp_E15-07-0497v1_CombinedSupMats.pdf [file supp_E15-07-0497v1_CombinedSupMats.pdf]

# Supplemental Materials

*Molecular Biology of the Cell*

Furuta et al.

## Legends for Supplemental Figures

**Supplemental Figure S1** Establishment of the TET-based RCC1-conditional knockout cell line.

- (A) Diagram of the RCC1 locus and the gene targeted construct. B: BglII and E: EcoRV sites. The position of the probes used for Southern hybridization and the expected size of each fragment used for hybridization are indicated.
- (B) Southern blot analysis of wild-type (CI18: RCC1 +/+), heterozygote (First KO: RCC1 +/-), heterozygote + TRE promoter RCC1 (pUHD: RCC1 +/-, RCC1<sup>tTA</sup>) and RCC1-null clone + TRE promoter RCC1 (2<sup>nd</sup> KO: RCC1 -/-, RCC1<sup>tTA</sup>). Genomic DNA digested with BglII or EcoRV was subjected to 1% agarose gel electrophoresis and hybridized with the L or R probe as shown in (A).
- (C) Protein levels of RCC1 in TET-based RCC1-conditional knockout cells following addition of TET. Whole cell lysates from wild type (CI18) and TET-based RCC1 conditional knockout cells (RCC1 -/-, RCC1<sup>tTA</sup>) at the indicated times after addition of 2 µg/ml TET were subjected to 5-20% SDS-PAGE, western blotting, and probed with affinity-purified polyclonal anti-RCC1 antibody. Loading control was probed with anti-histone H3.
- (D) Proliferation of TET-based RCC1 conditional knockout cells (RCC1 -/-, RCC1<sup>tTA</sup>) after addition of TET. After addition of 2 µg/ml TET, live cells were counted after Trypan blue staining at the indicated times.
- (E) Cell cycle distribution of TET-based RCC1 conditional knockout cells (RCC1 -/-, RCC1<sup>tTA</sup>) after addition of TET. Samples were collected at the indicated times after addition of 2 µg/ml TET. Propidium Iodide (x axis, linear scale) and BrdU (y axis, log scale) incorporation were analyzed by FACS. The boxes represent populations of G1 phase cells, and the numbers indicates the percentages of G1 populations.

## Supplemental Figure S2

Sequence alignment of RCC1 from various species (*Gallus gallus*, *Homo sapiens*, and *Xenopus laevis*). Bold letters indicate expected NLS, and the box indicates the deleted region of NTD. Mutated residues are marked with arrowheads.

### **Supplemental Figure S3**

Supporting data for Figure 3B. Subcellular localization of each RCC1 mutant in large field images. RCC1-deficient cells expressing RCC1<sup>wild</sup>-GFP, RCC1<sup>Histone/DNA</sup>-GFP, RCC1<sup>Δ20</sup>-GFP or RCC1<sup>Ran</sup>-GFP (green) were stained with Hoechst (blue), respectively. Scale bar, 10 μm.

### **Supplemental Figure S4**

Supporting data for Figure 5A. Subcellular localization of each RCC mutant in large field images. RCC1-deficient cells expressing RCC1<sup>Δ20/histone/DNA</sup> or RCC1<sup>Δ20/histone/DNA</sup>-NLS (green) were stained with Hoechst (blue), respectively. Scale bar, 10 μm.

### **Supplemental Figure S5**

Summary of phenotypes of RCC-deficient cells expressing various RCC mutants used in this paper. Ran GEF activity was predicted by cellular viability and its crystal structure study.

### **Supplemental Movies**

**Movie S1** Live cell imaging of Aid-based RCC1 conditional knockout cells (RCC1 <sup>-/-</sup>, RCC1<sup>tTA</sup>, Aid-RCC1) expressing histone H2B-RFP (red) and GFP-tubulin (green). Cells were maintained in the presence of 2 μg/ml TET, and fluorescence images were acquired at 3-min intervals in the presence of 500 μM IAA.

**Movie S2** Live cell imaging of Aid-based RCC1 conditional knockout cells (RCC1 <sup>-/-</sup>, RCC1<sup>tTA</sup>, Aid-RCC1) in the absence of IAA. This image is control for Movie S1.

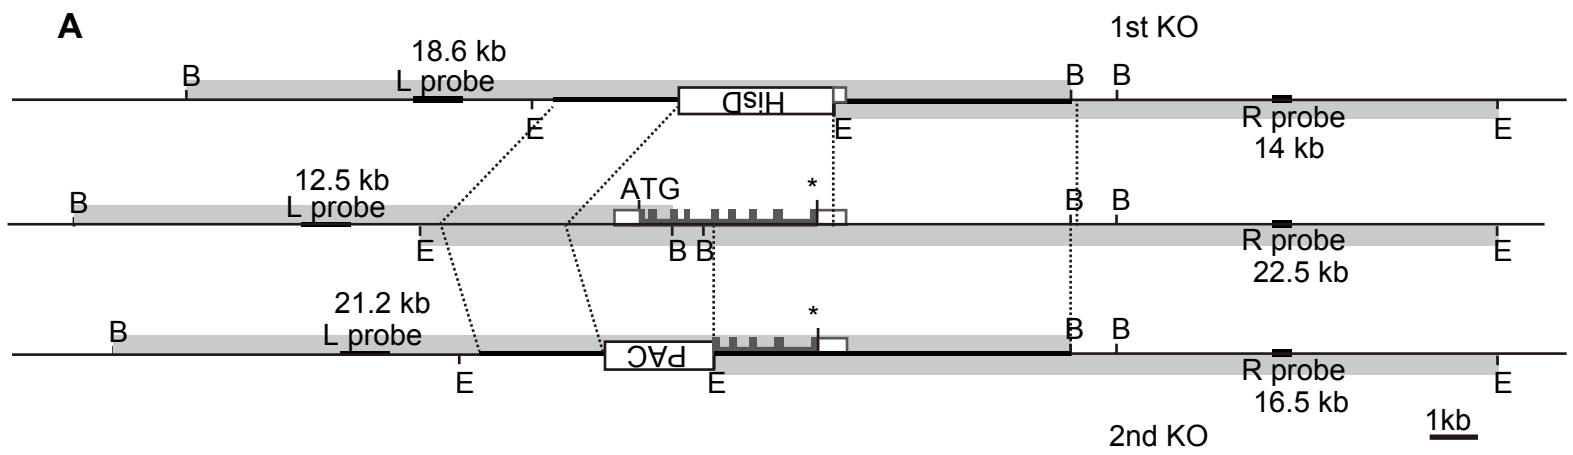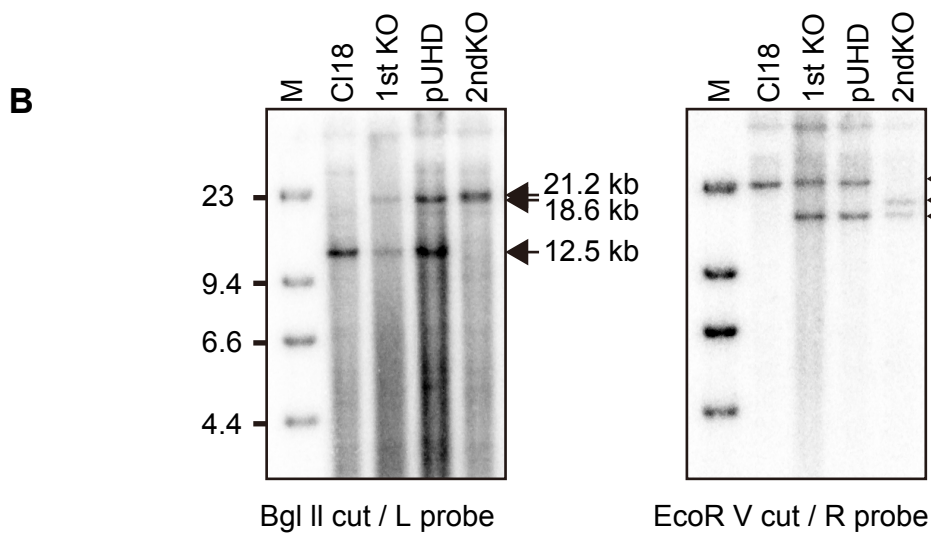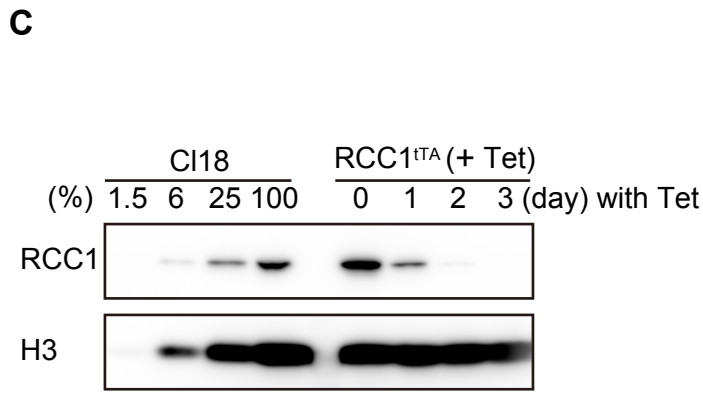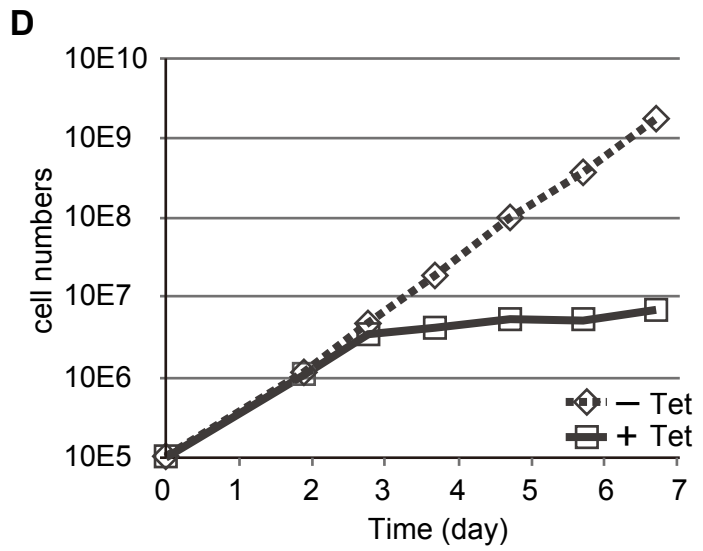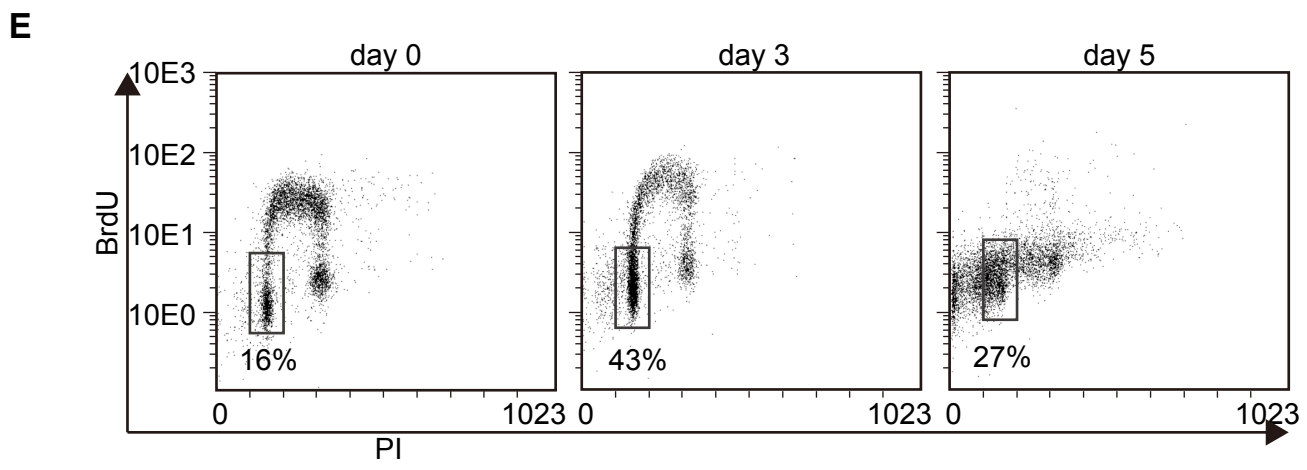

Supplemental figure 1

```

ggRCC1      MSGKRAAKK-SPALEE--PPERKKKLK----VSHPSHRTQPGLVVLVLGQGDVGQLGLGQDV
hRCC1      MSPKRIAKRRSPPADA--IPKSKKVK----VSHRSHSTEPGLVLTGLGQGDVGQLGLGENV
xlRCC1      MKGKKTLLKRTIAAEESNGTSDVKKTKALPIVTHPSHGTVGGQVLTGLGQGDVGQLGLGEDI
              *. *: *: .. : .. ** * *: * ** * * ** .*****: : :
                    M76R
ggRCC1      MERKKPALVQLPELMVQVEAGGMHTVCLSETGKIYTFGCNDEGALGRDTSEEGSECTPGP
hRCC1      MERKKPALVSIPEDEVVQAEAGGMHTVCLSKSGQVYSFGCNDEGALGRDTSVEGSEMVPVK
xlRCC1      MERKKPALVTLTEDIVQAAAGGMHTVCLGASGSIYTFGCNDEGALGRDTSEEGSEMOPVK
              ***** :.* :** . ***** . :*.:*:***** ***** **

ggRCC1      VELQERVVQVSAGDSHTAALTDDGRVFIWGSFRDNGVIGLLEPMKKSTVPVLLQLNVPV
hRCC1      VELQEKVVQVSAGDSHTAALTDDGRVFLWGSFRDNGVIGLLEPMKKSMVPVQVQLDVPV
xlRCC1      VELA EKVVQVSAGDSHTAALTEDGRVFVFGSFRDNGVIGLLEPMKKSMVPVQVQINTPV
              *** *:*****:*****:***** ***** ** :*:.**
                              R216E          R231E K233E
ggRCC1      VKIVSGNDHLVMLTVDGDLFTCGCGEQGQLGRVPALFSNRGGRKGLQRLLVPQRPVVRGK
hRCC1      VKVASGNDHLVMLTADGDLYTLGCGEQGQLGRVPELFANRGGRRQGLERLLVPKCVMLKSR
xlRCC1      IKIASGNDHLVLLTVDGDLYTSGCGEQGQLGRVPERFTNRGGRKGLERLLVPQC IHLKAK
              :*:.*****:*.***:* ***** ***** *:*****:*:*****: : : : :

ggRCC1      GK---MRFQDAFCGAYFTFAITREGHIYGFGLSNYHQLGTQGTPECFSPQNLT SFKNSTK
hRCC1      GSRGHVRFQDAFCGAYFTFAISHEGHVYGFGLSNYHQLGTPGTESCFIPQNLT SFKNSTK
xlRCC1      GS-GRVHFQDVFCGAYFTFAVSQEGHVYGFGLSNYHQLGTKNTQACYAPQNLT SFKNSTK
              *. :*:*****:*****:*****:***** ***** .*:.*: *****

ggRCC1      SWVGFSGGQHHTVCVDSEGKAYSLGRAEYGRLLGLGEGAEKSTPTVIPDLPSISSVACGA
hRCC1      SWVGFSGGQHHTVCMDSEGKAYSLGRAEYGRLLGLGEGAEKSIPTLISRLPAVSSVACGA
xlRCC1      SWIGFSGGQHHTVCVDSEGKAYSLGRAEYGRLLGENAEEQSEPTPIPDLPKINSVASGA
              **:*:*****:*****:***** ***** .***:* ** *. ** :.***.*

ggRCC1      SVGYAVSSDGRAFAWGMGTNHQLGTGEEEDVWSPVEMTGKQLENRLVLAVSSGGQHTALL
hRCC1      SVGYAVTKDGRVFAWGMGTNYQLGTGQDEDAWSPVEMMGKQLENRVVLSVSSGGQHTVLL
xlRCC1      SVSYAVSTDGCVFAWGMGTNLQLGTGEEEDVWSPQMTGKHLEDREVLSVSSGGQHTVLL
              **.***:.** .***** *****:***.** * **:***:* **:******.*

ggRCC1      VKDKARS
hRCC1      VKDKEQS
xlRCC1      VRKRS--
              *:.:

```

Supplemental figure 2

RCC1<sup>wild</sup>

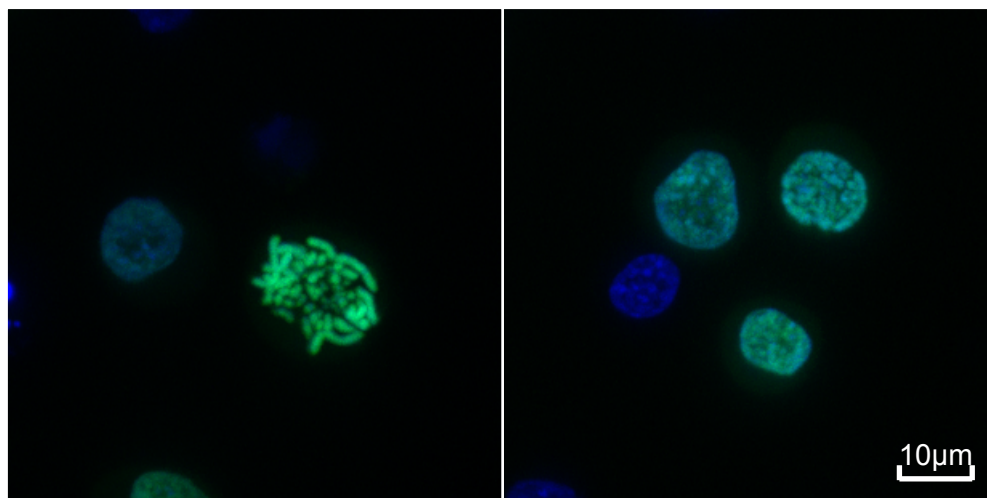

RCC1<sup>Ran</sup>

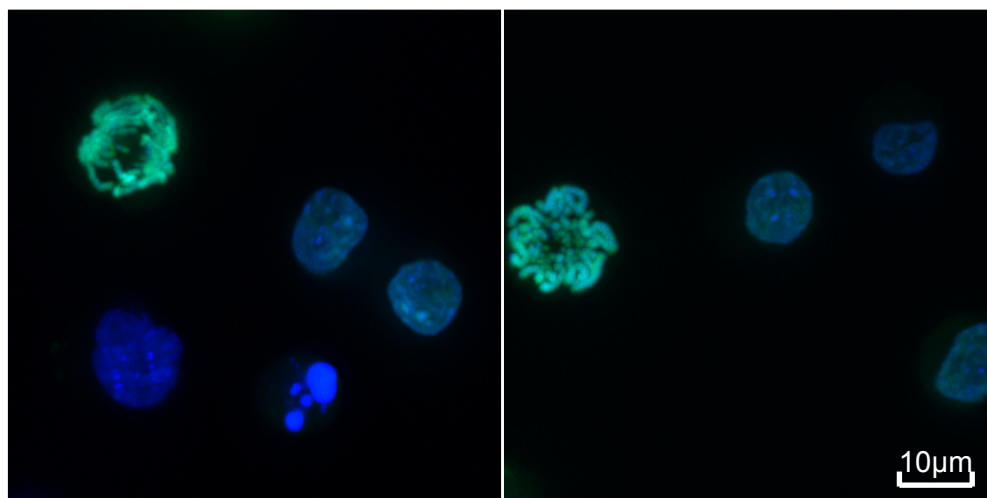

RCC1<sup>Histone/DNA</sup>

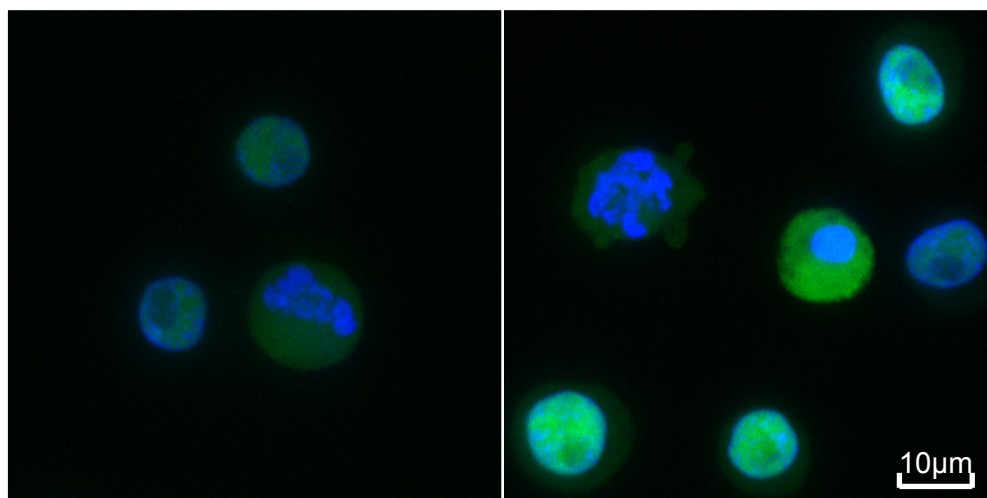

RCC1<sup>Δ20</sup>

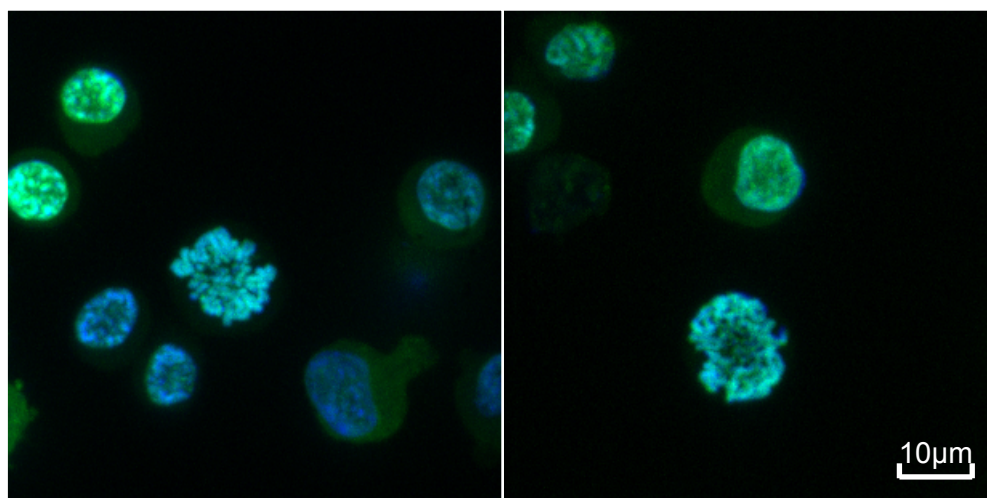

Supplemental figure 3



RCC1<sup>Δ20</sup>/Histone/DNA

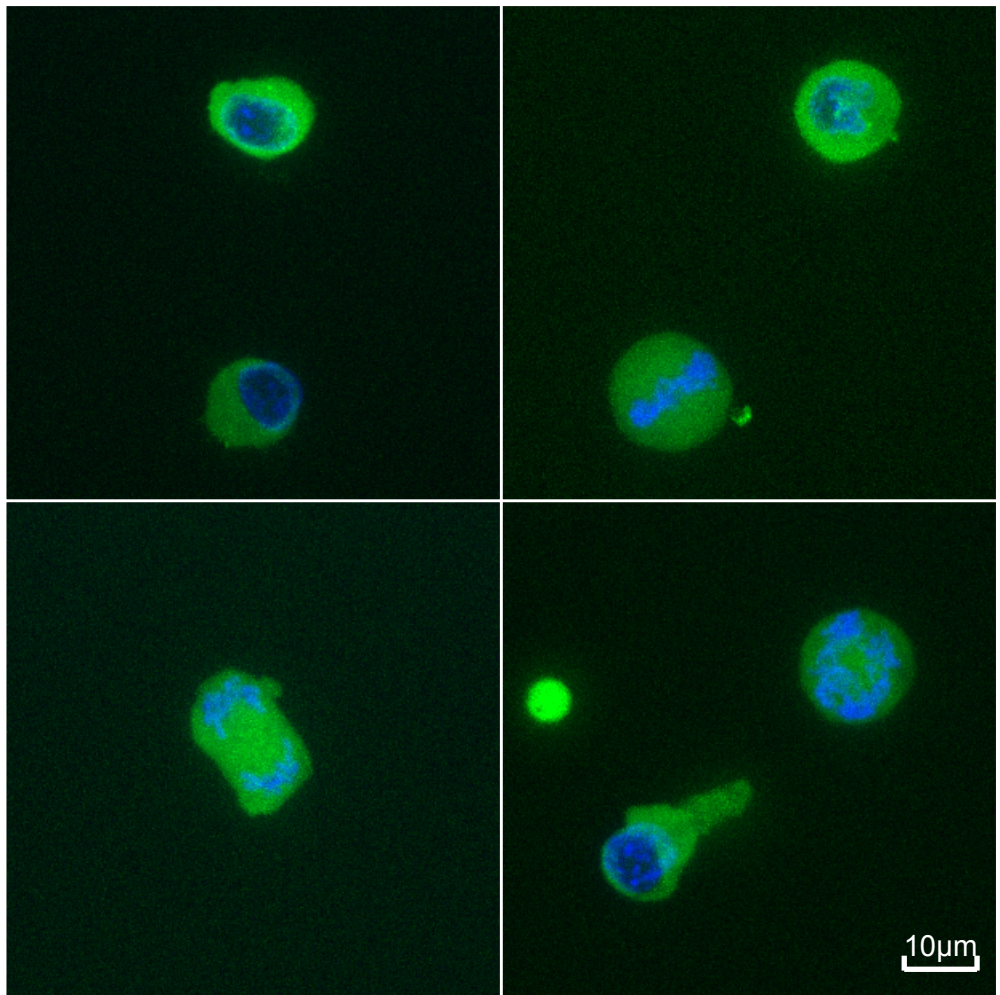

RCC1<sup>Δ20</sup>/Histone/DNA\_NLS

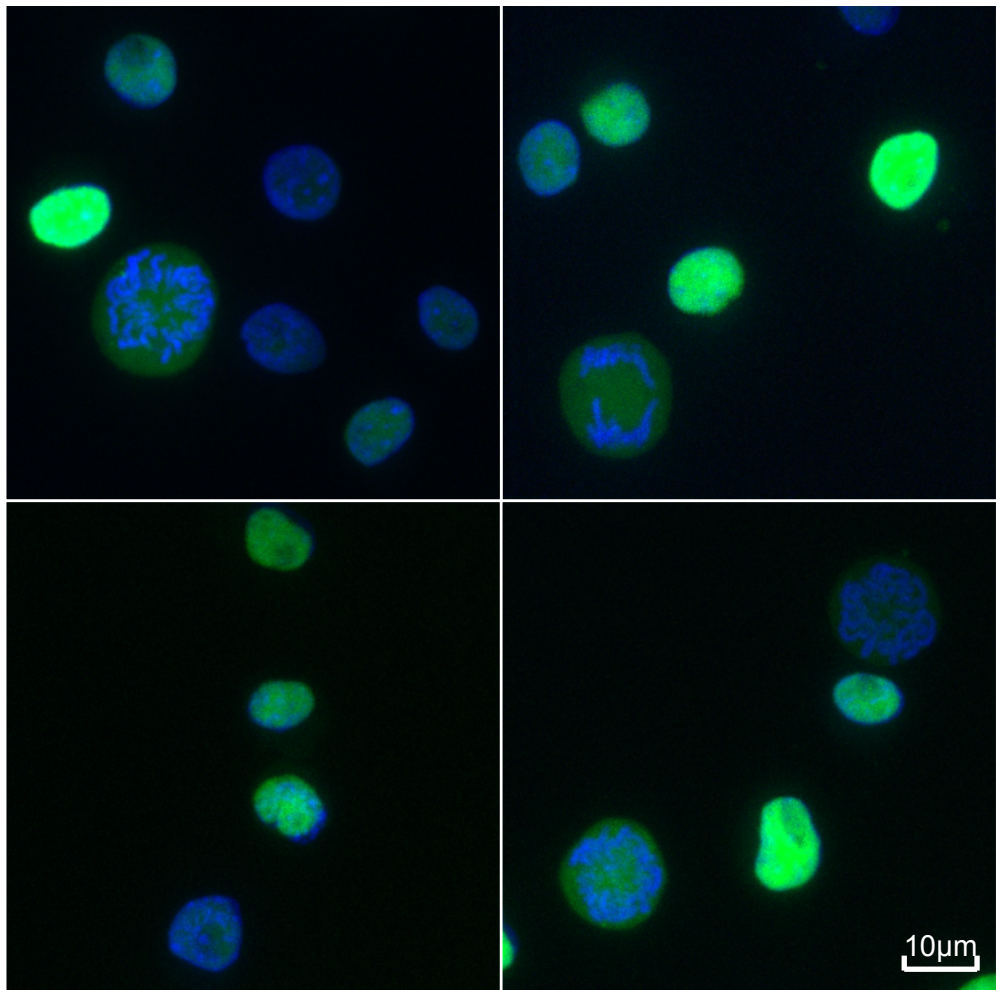

Supplemental figure 4

| RCC1                                | GEF activity | Chromatin binding | Nuclear import | Nuclear localization | Cell viability | Ref.                 |
|-------------------------------------|--------------|-------------------|----------------|----------------------|----------------|----------------------|
| RCC1 <sup>wild</sup>                | +            | +                 | +              | +                    | +              |                      |
| RCC1 <sup>Ran</sup>                 | —            | +                 | +              | +                    | —              | Renault et al., 2001 |
| RCC1 <sup>Histone/DNA</sup>         | +            | —                 | +              | +                    | +              | Makde et al., 2010   |
| RCC1 <sup>Δ20</sup>                 | +            | +                 | —              | +                    | +              | Renault et al., 1998 |
| RCC1 <sup>Δ20/Histone/DNA</sup>     | +            | —                 | —              | —                    | —              |                      |
| RCC1 <sup>Δ20/Histone/DNA-NLS</sup> | +            | —                 | +              | +                    | +              |                      |
